# Supplementary material
Source: Springer Nature journal article supplement (https://www.springermedizin.de/resource/supplementary/13002_2011_248_MOESM3_ESM.pdf/9627476)

(A)

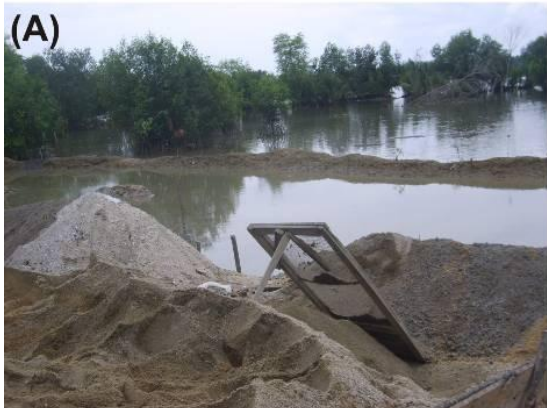

(B)

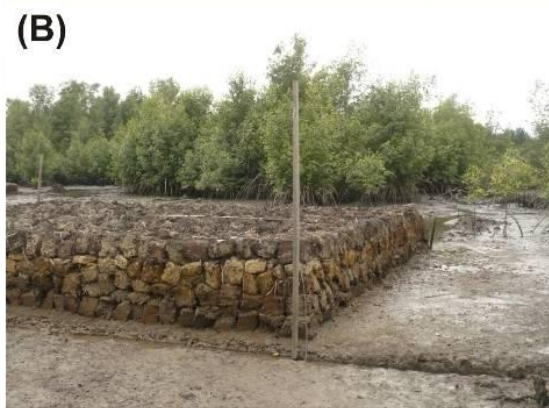

(C)

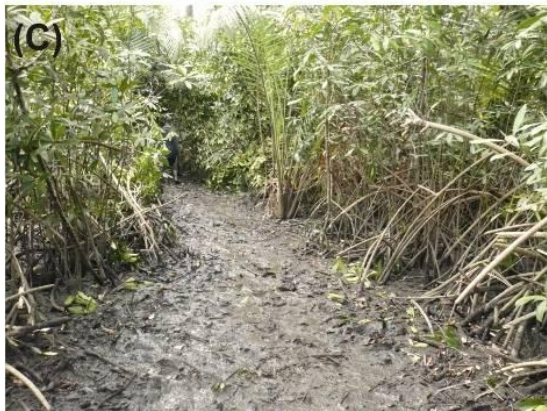

(D)

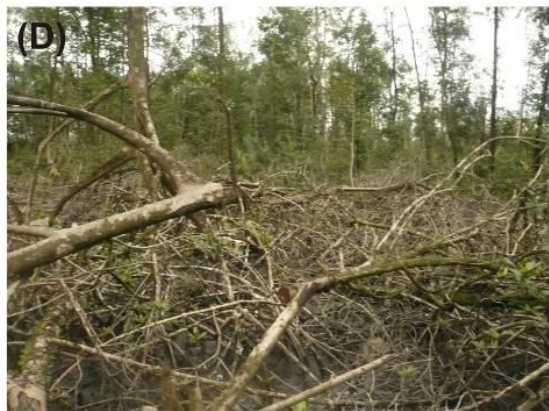

Supplement: MOESM3 [file 9627476]
